# Supplementary material for: LamaH | La rge-Sa m ple D a ta for H ydrology and Environmental Sciences for Central Europe
Source: Copernicus journal article supplement (doi:10.5194/essd-2021-72), 2021-03-18

ID\_376.csv

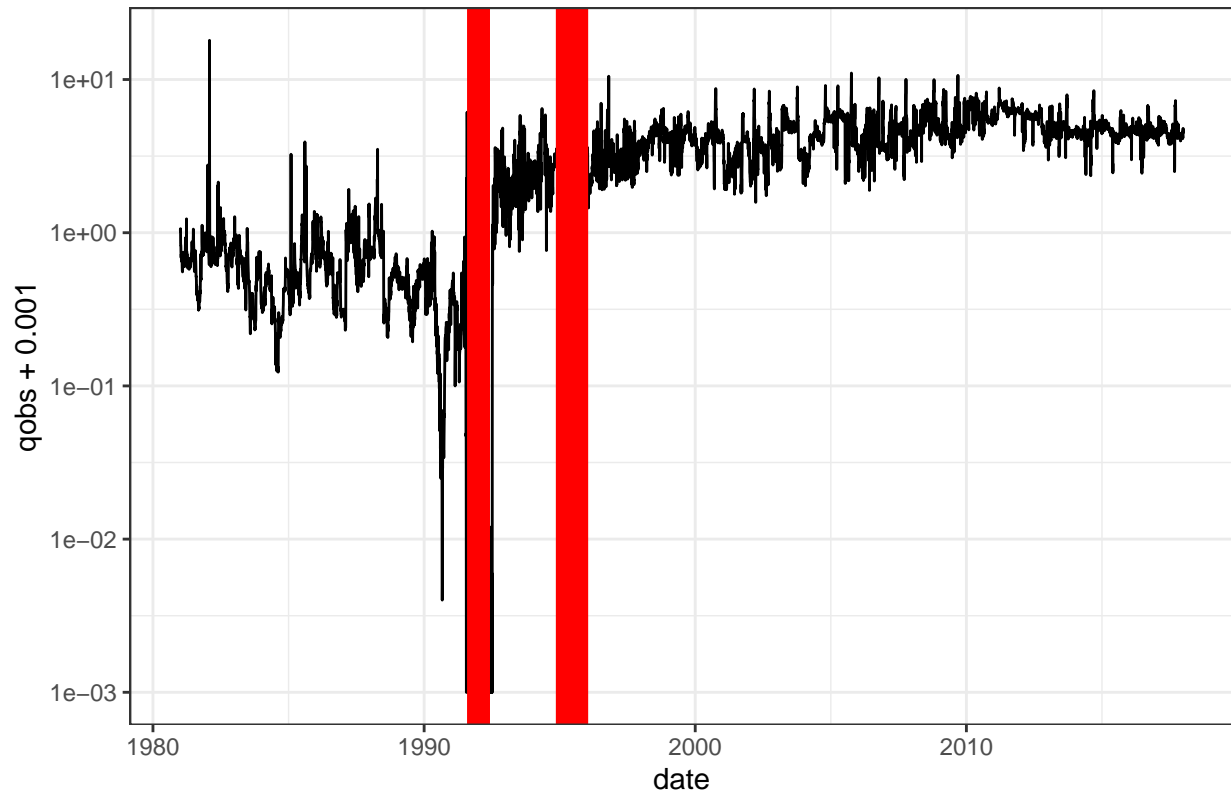

Supplement: Supplementary file [file essd-2021-72-RC1-supplement.zip]
